# Supplementary material
Source: publisher site journal article supplement (https://www.dovepress.com/get_supplementary_file.php?f=312523.docx)
Supplement: Supplementary file 1 [file get_supplementary_file.php]

# Appendix A

An overview of the different costs included in the analysis.

| Category | Type | Data source | Data | Unit cost |
| --- | --- | --- | --- | --- |
| Primary care  (All costs included) | - GP consultations - On-call doctor scheme contacts | - Northern Jutland Region registry | - Date and type of service provided for each contact | - Tariffs from collective agreement with the Danish Medical Association 1 |
| Secondary care  (only COPD related costs included) | - Hospital admissions - Emergency room visits - Out-patient clinic visits | - Northern Jutland Region registry | - Date, diagnosis, procedures performed and length of stay | - Valued according to the Danish Diagnosis-Related Grouping (DRG) system 2 |
| Municipality- and social care  (All costs included) | - Home care nursing - In-home assistance - Household cleaning - Rehabilitation | - Local register, Aalborg Municipality | - Number of visits and time consumption in each care category   (Registrations from Aalborg Municipality) | - Average national effective hourly wage rates 3 |
| Medicine  (only COPD related costs included, see appendix B) | - Prescribed inhalation medicine - Prescribed oral corticosteroids and antibiotics | - The Danish Prescription Registry | - Date the medicine was redeemed, type, number of packages | - Pharmacy consumer prices 4 |
| Intervention costs | - HFNC device | - Fisher & Paykel Healthcare Ltd, Auckland, New Zealand | - Average yearly cost per patient £425.69 | - Mean European prices - Annuitized over a 5-year period at a discount rate of 4 %. Original cost £1895 |
| - Oxygen stand | - Local oxygen company | - Average yearly cost per patient (£37.81) | - Annuitized over a 5-year period at a discount rate of 4 %. Original cost £168. |
| - Consumables (six breathing tubes, six autofill chambers, 12 optiflow nasal cannulas) | - Fisher & Paykel Healthcare Ltd, Auckland, New Zealand | - Cost per amount used per patient per year (£493.50) | - Mean European prices |
| - HFNC device set-up and service | - Local oxygen company | - Yearly fixed cost per patient (£279) | - Yearly average cost paid to the oxygen company over the last 5 years. |

All costs except intervention costs were gathered 12 months pre-study and during the 12 months study period.

# Appendix B

Groups of medications included in the estimation of costs for prescription medicine

| ATC | Name |
| --- | --- |
| H02AB06 | Prednisolone |
| J01CR02 | Amoxicillin and beta-lactamase inhibitor |
| J01FA06 | Roxithromycin |
| J01FA10 | Azithromycin |
| J01MA02 | Ciprofloxacin |
| J01MA14 | Moxifloxacin |
| R03 | Drugs for obstructive airway diseases |

Abbreviations: ATC - Anatomical Therapeutic Chemical Classification System

# Appendix C

## The imputation model

In the present study, missing data was handled by use of multiple imputation (MI) and conducted in accordance with the methods described by Faria et al.5

At baseline there were 2% missing values in the EQ-5D-3L index score (three patients in the HFNC-treated group and one in the control group). During the trial, 28 patients (14%) died (16 in the HFNC-treated group and 12 in the control group). The patients who died were assigned an EQ-5D-3L summary score of zero at the date of their death, and the score was used for interpolation in the estimation of QALY gain. An increase in missing EQ-5D-3L summary score data was observed at the two follow-up time points at 6 months and 12 months. At 6 months follow-up, 45 (23%) patients had missing data in the EQ-5D-3L summary score (24 in the HFNC-treated group and 21 in the control group), whereas at 12 months, 40 (20%) patients had missing data in the EQ-5D-3L summary score (18 in the HFNC-treated group and 12 in the control group).

Complete information existed on all cost parameters at baseline and follow-up except for municipality costs, where 100 (50%) patients had missing data (49 in the HFNC-treated group and 51 in the control group). Data on municipality resource use was missing for eight patients living in Aalborg Municipality.

Missing data at follow-up was assumed missing at random (MAR) based on visual inspection and logistic regression of indicators of missing cost and QALY data. For example, baseline BMI and mMRC score demonstrated to be associated with missing QALY, suggesting that data did most likely not follow the MCAR assumption (i.e. the probability of data being missing does not depend on the observed or unobserved characteristics of study participants). Based on this, missing data was handled using MI chained equations in Stata v.15 by use of the algorithm *[mi impute chained, pmm,knn(5))]*. The imputation model accounted for missing data at both baseline and at follow-up, and was estimated separately for the HFNC-treated group and the control group. Fifty complete datasets were generated. The imputation model included the following variables: age, gender, BMI at baseline, mMRC at baseline, spirometry measures at baseline (forced exporatory volume in 1 second (FEV1), forced vital capacity (FVC)), arterial blood gas measures at baseline (pH, PaCO2, PaO2, SaO2), baseline measures from the 6 minute walking test (systolic and diastolic blood pressure, the BORG breathlessness score), number of self-reported exacerbations in the year preceding study recruitment, baseline EQ-5D-3L index score, the summary score of EQ-5D-3L at 6 and 12 months of follow-up, municipality costs in the year preceding study recruitment, municipality costs in the study year, hospital admission costs in the year preceding study recruitment, hospital ambulatory care costs in the year preceding study recruitment, and medicine costs in the year preceding study recruitment.

The skewed and bounded nature of the EQ-5D-3L scores and costs were taken into account in the imputation model by using predictive mean matching (PMM) with the k=5 nearest neighbors. By using PMM, predictions that lay outside the bounds of each variable are avoided, and instead the missing value is replaced with the nearest observed value (in this case with one of the nearest 5 observed values).

1. Honorartabel [Fee table]. Lægeforeningen. Published 2018. Accessed May 31, 2020. https://www.laeger.dk/sites/default/files/overenskomst_om_almen_praksis_ok18_endelig_udgave.pdf

2. Afregning og finansiering (DRG) [Reimbursement and financing (DRG)]. Sundhedsdatastyrelsen. Accessed June 28, 2020. https://sundhedsdatastyrelsen.dk/da/afregning-og-finansiering

3. Statistikbanken - LONS20: Løn efter arbejdsfunktion, sektor, aflønningsform, lønmodtagergruppe, lønkomponenter og køn [Statistikbanken - LONS20: Wages estimated based on job function, sector, payment form, employment group, wage component and gender]. Danmarks Statistik. Published 2019. Accessed June 6, 2020. www.statistikbanken.dk

4. Priser på medicin [Prices on medicines]. Lægemiddelstyrelsen. Published 2020. Accessed May 31, 2020. https://laegemiddelstyrelsen.dk/da/tilskud/priser/#

5. Faria R, Gomes M, Epstein D, White IR. A guide to handling missing data in cost-effectiveness analysis conducted within randomised controlled trials. *Pharmacoeconomics*. 2014;32(12):1157-1170.
